# Supplementary material for: Chronic Gut Inflammation and Dysbiosis in IBS: Unraveling Their Contribution to Atopic Dermatitis Progression
Source: MDPI journal article supplement (doi:10.3390/ijms25052753), 2024-02-27
Supplement: s1 [file s1]

## Supplementary material

### Chronic Gut Inflammation and Dysbiosis in IBS: Unraveling Their Contribution to Atopic Dermatitis Progression

**Jae-Hwan Jang** <sup>1,†</sup>, **Sun-Young Jang** <sup>2,3,†</sup>, **Sora Ahn** <sup>3,4</sup>, **Ju-Young Oh** <sup>3,4</sup>, **Mijung Yeom** <sup>4</sup>, **Seok-Jae Ko** <sup>5</sup>, **Jae-Woo Park** <sup>5</sup>, **Soon-Kyeong Kwon** <sup>6</sup>, **Kyuseok Kim** <sup>7</sup>, **In-Seon Lee** <sup>4,8</sup>, **Dae-Hyun Hahm** <sup>4,9</sup> and **Hi-Joon Park** <sup>3,4,10,\*</sup>

<sup>1</sup> Jaseng Spine and Joint Research Institute, Jaseng Medical Foundation, Seoul, 05854, Republic of Korea; jjh2392@jaseng.org

<sup>2</sup> Department of Science in Korean Medicine, Graduate School, Kyung Hee University, Seoul 02447, Republic of Korea; jsy9885@khu.ac.kr (S.-Y.J.)

<sup>3</sup> Department of Anatomy and Information Sciences, College of Korean Medicine, Kyung Hee University, Seoul 02447, Republic of Korea; ohjuyoung@khu.ac.kr; lljasmintll@gmail.com (S.A.)

<sup>4</sup> Acupuncture & Meridian Science Research Center, Kyung Hee University, Seoul 02447, Republic of Korea; myeom@khu.ac.kr (M.Y.); insoon.lee@khu.ac.kr (I.-S.L.); dhhahm@khu.ac.kr (D.-H.H.)

<sup>5</sup> Department of Gastroenterology, College of Korean Medicine, Kyung Hee University, Seoul 02447, Republic of Korea; kokokoko119@hanmail.net (S.-J.K.); pjw2907@hanmail.net (J.-W.P.)

<sup>6</sup> Division of Applied Life Science (BK21), Gyeongsang National University, Jinju 52828, Republic of Korea; skkwon@gnu.ac.kr

<sup>7</sup> Department of Ophthalmology, Otorhinolaryngology, and Dermatology of Korean Medicine, College of Korean Medicine, Kyung Hee University, Seoul 02447, Republic of Korea; kuseok@hanmail.net

<sup>8</sup> Department of Meridian & Acupoint, College of Korean Medicine, Kyung Hee University, Seoul 02447, Republic of Korea

<sup>9</sup> Department of Physiology, School of Medicine, Kyung Hee University, Seoul 02447, Republic of Korea

<sup>10</sup> Department of KHU-KIST Convergence Science & Technology, Kyung Hee University, 26 Kyungheedaero, Dongdaemun-gu, Seoul 02447, Republic of Korea

\* Correspondence: acufind@khu.ac.kr

+these authors contributed equally to this work

\*Corresponding author: Hi-Joon Park

Acupuncture and Meridian Science Research Center, Kyung Hee University, 26 Kyungheedaero, Dongdaemoon-gu, Seoul 02447, Republic of Korea.

E-mail: acufind@khu.ac.kr

**Table S1.** Detailed information on group allocation

Experiment 1: Establishment of 2,4,6-trinitrobenzenesulfonic acid (TNBS)-induced IBS mouse.

| Group | Treatment              |
|-------|------------------------|
| CON   | Ethanol-injected group |
| IBS   | TNBS-injected group    |

Experiment 2: Changes of AD symptoms in TNBS-induced IBS mouse

| Group  | Treatment                |                    |
|--------|--------------------------|--------------------|
|        | Injection into the colon | On the right cheek |
| CON    | 50% ethanol              | 100% ethanol       |
| IBS    | TNBS                     | 100% ethanol       |
| AD     | 50% ethanol              | MC903              |
| IBS+AD | TNBS                     | MC903              |

Experiment 3: Changes of AD symptoms in mice transplanted with gut microbiota from IBS mice

| Group |      | Treatment                                            |                    |
|-------|------|------------------------------------------------------|--------------------|
|       |      | FMT                                                  | On the right cheek |
| CON   | C-MF | transplanted with fecal microbiota from the CON mice | 100% ethanol       |
|       | I-MF | transplanted with fecal microbiota from the IBS mice |                    |
| AD    | C-MF | transplanted with fecal microbiota from the CON mice | MC903              |
|       | I-MF | transplanted with fecal microbiota from the IBS mice |                    |

Experiment 4: Changes of AD symptoms in mice transplanted with gut microbiota from the IBS patient.

| Group |      | Treatment                                               |                    |
|-------|------|---------------------------------------------------------|--------------------|
|       |      | FMT                                                     | On the right cheek |
| CON   | C-HF | transplanted from the gut microbiota of healthy control | 100% ethanol       |
|       | I-HF | transplanted from the gut microbiota of the IBS patient |                    |
| AD    | C-HF | transplanted from the gut microbiota of healthy control | MC903              |
|       | I-HF | transplanted from the gut microbiota of the IBS patient |                    |

**Table S2.** Primer for real-time PCR

| Primer                                     | Forward                 | Reverse                 |
|--------------------------------------------|-------------------------|-------------------------|
| <i>Il-6</i> (Interleukin 6)                | TACCACTTCACAAGTCGGAGGC  | CTGCAAGTGCATCATCGTTGTTT |
| <i>Il6r</i> (Interleukin 6 receptor)       | GTCATCCATGATGCCTTGCG    | GTGGTCCTGGGCTCTATCCAA   |
| <i>Il-4</i> (interleukin 4)                | CCCCCAGCTAGTTGTCATCC    | AGGACGTTTGGCACATCCAT    |
| <i>Il-4r</i> (interleukin 4 receptor)      | ACGTGGTACAACCACTTCCA    | TGCGGGTACTTGGTTGACTC    |
| <i>Mmp12</i> (Matrix metalloproteinase 12) | TGTATTTTGTATCTGCCTGTGGG | CTGGGGCACTGCTCTAAGAT    |
| <i>Il-31</i> (Interleukin 31)              | AACAACGAAGCCTACCCTGG    | TGGTTAATGCTTCCCGGTCC    |
| <i>Il-22</i> (interleukin 22)              | TGCGATCTCTGATGGCTGTC    | CCTCGGAACAGTTTCTCCCC    |
| <i>Ifn-γ</i> (interferon gamma)            | GAGGTCAACAACCCACAGGT    | GGGACAATCTCTTCCCCACC    |
| <i>Gata3</i> (GATA Binding Protein 3)      | CCTCTGGAGGAGGAACGCTAAT  | GTTTCGGGTCTGGATGCCTTCT  |
| <i>Il-22</i> (interleukin 22)              | TGCGATCTCTGATGGCTGTC    | CCTCGGAACAGTTTCTCCCC    |

**Table S3.** Demographics and characteristics of donor (HC and IBS)

|                          | HC     | IBS    |
|--------------------------|--------|--------|
| Sex                      | Male   | Female |
| Age                      | 24     | 39     |
| BMI (kg/m <sup>2</sup> ) | 25.5   | 19.1   |
| IBS-SSS                  | 7      | 313    |
| Bristol Stool Form Scale | Normal | Type 6 |
| IBS-D                    | -      | 65%    |

HC; Health control

IBS; irritable bowel syndrome
